# Supplementary material
Source: PubMed Central journal article supplement (PMC3196482)
Supplement: supp_djr350_JNCI_10_0599_s01.pdf [file supp_djr350_JNCI_10_0599_s01.pdf]

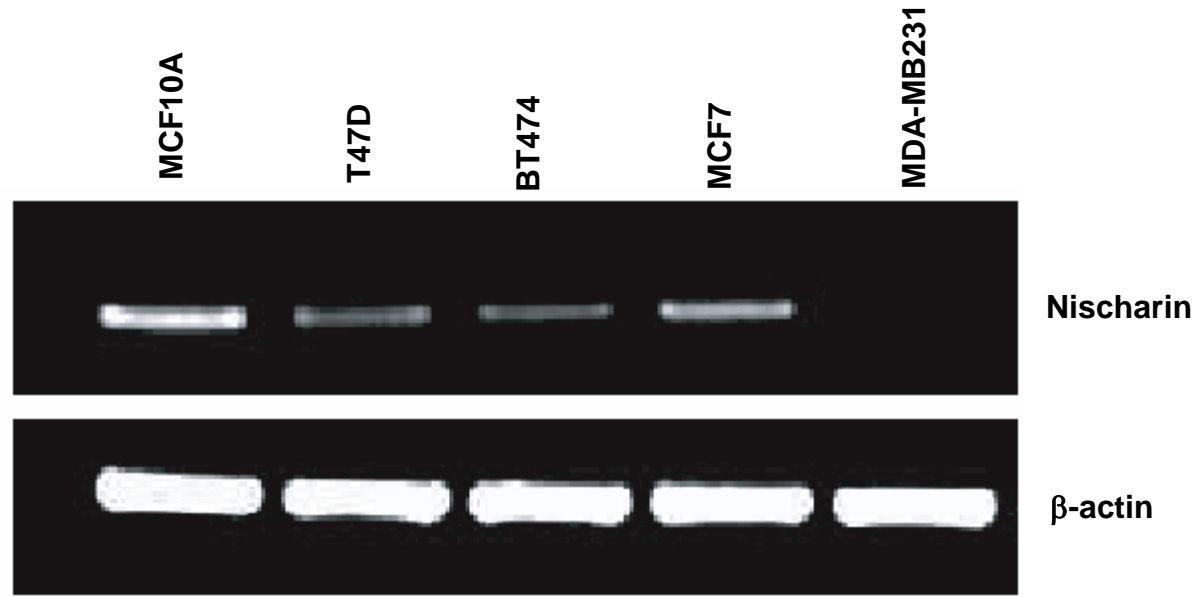

**Supplementary Figure 1.** Nischarin mRNA expression in various breast cancer cell lines. Reverse transcription-polymerase chain reaction (RT-PCR) was performed using Nischarin-specific primers and total RNA that was prepared from MCF-10A, MCF-7, T47D, BT-474, and MDA-MB-231 breast cancer cells (top panel). RT-PCR of  $\beta$ -actin served as a control (bottom panel).
