# Supplementary material
Source: PubMed Central journal article supplement (PMC3196482)
Supplement: supp_djr350_JNCI_10_0599_s02.pdf [file supp_djr350_JNCI_10_0599_s02.pdf]

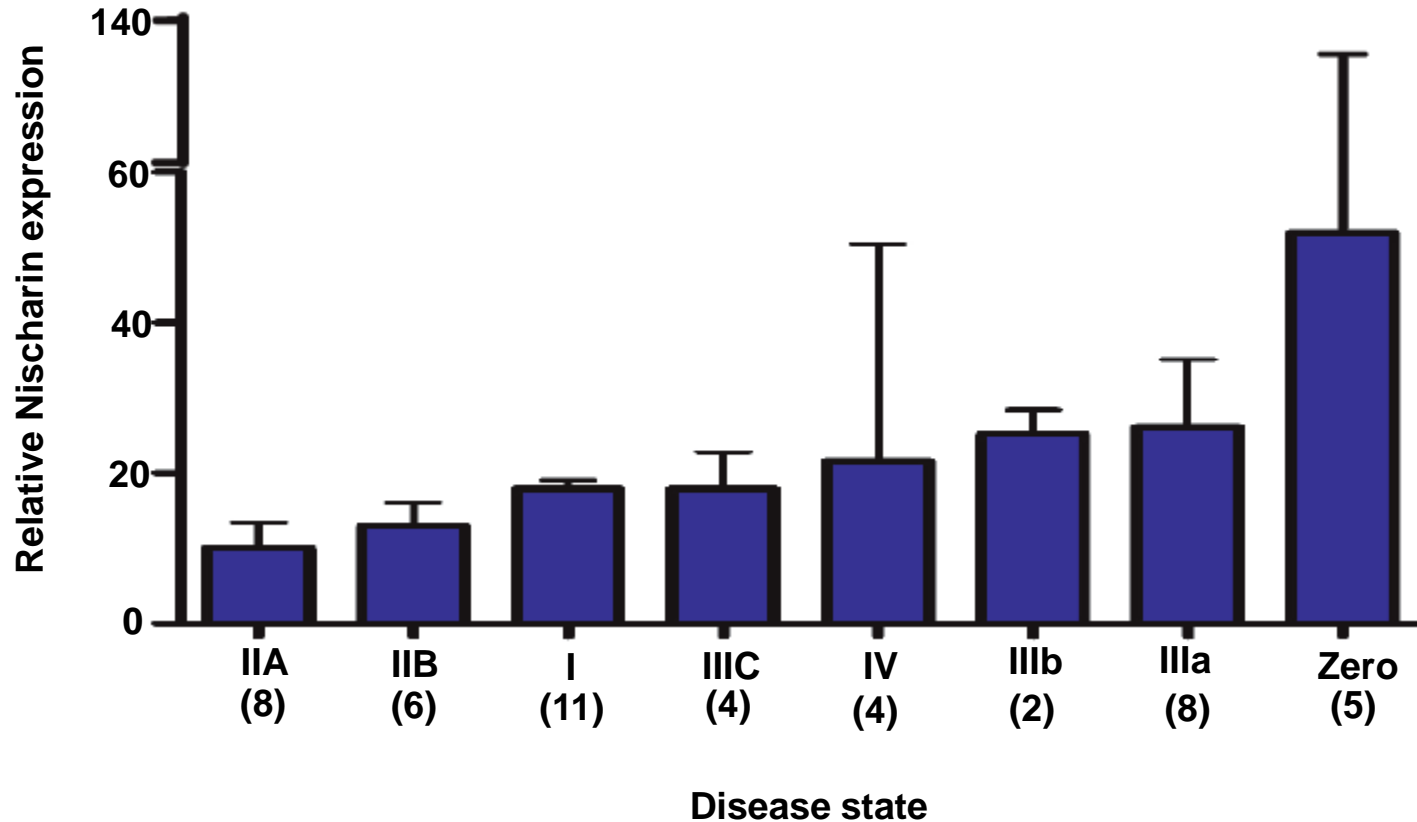

**Supplementary Figure 2.** Nischarin expression in a breast tissue cDNA panel. Quantitative polymerase chain reaction (PCR) was performed using nischarin-specific primers and a commercially available PCR array (Origene BCRT-02) that included cDNA from different breast cancer tissues. Nischarin levels were normalized to glyceraldehyde 3-phosphate dehydrogenase (GAPDH) levels determined by quantitative PCR. Triplicate measurements from multiple samples at each of eight breast cancer stages were then averaged (number of specimens, in parentheses) and means with 95% confidence intervals are shown. Noninvasive cancers (stage 0) had higher expression of nischarin whereas other invasive cancers (stage I, II, III and IV) had lower expression.
