# Supplementary material
Source: PubMed Central journal article supplement (PMC3196482)
Supplement: supp_djr350_JNCI_10_0599_s04.pdf [file supp_djr350_JNCI_10_0599_s04.pdf]

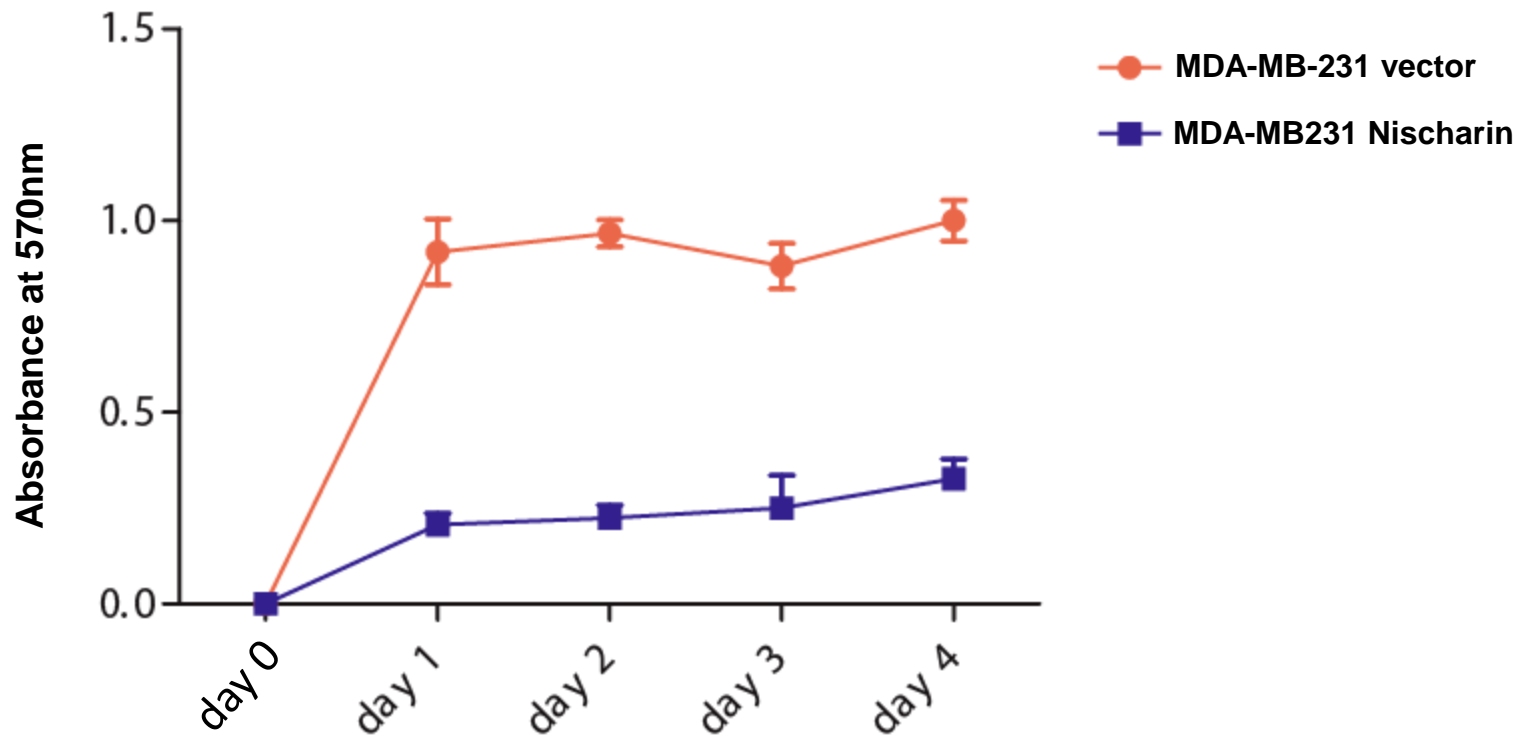

**Supplementary Figure 4.** Effect of nischarin overexpression on MDA-MB-231 cell proliferation. MDA-MB-231 cells that had been stably transduced with a plasmid expressing nischarin or the empty vector were seeded into 96-well plates (5000 cells per well) and 3-(4,5-dimethylthiazol-2-yl)-2,5-diphenyltetrazolium bromide (MTT) assays were performed every day to measure cell growth according to manufacturer's protocol (Millipore, Bedford, MA). Results shown are representative of three different experiments. Cells expressing nischarin grew more slowly relative to control cells (at day 5, normalized mean density of MDA-MB-231 (GFP) cells = 1.000, of MDA-MB-231 (GFP-nischarin) cells = 0.3267, difference, = 0.6733, 95% confidence interval (CI) = 0.6261 to 0.7206,  $P < .001$ ) Error bars represent 95% confidence intervals, and the  $P$  value was calculated using a two-sided Student t-test.
