# Supplementary material
Source: PubMed Central journal article supplement (PMC3196482)
Supplement: supp_djr350_JNCI_10_0599_s05.pdf [file supp_djr350_JNCI_10_0599_s05.pdf]

**A**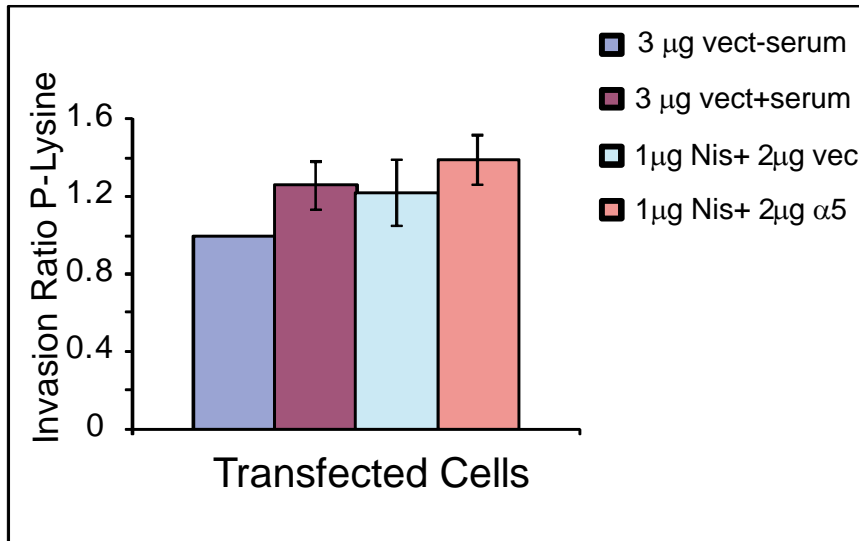**B**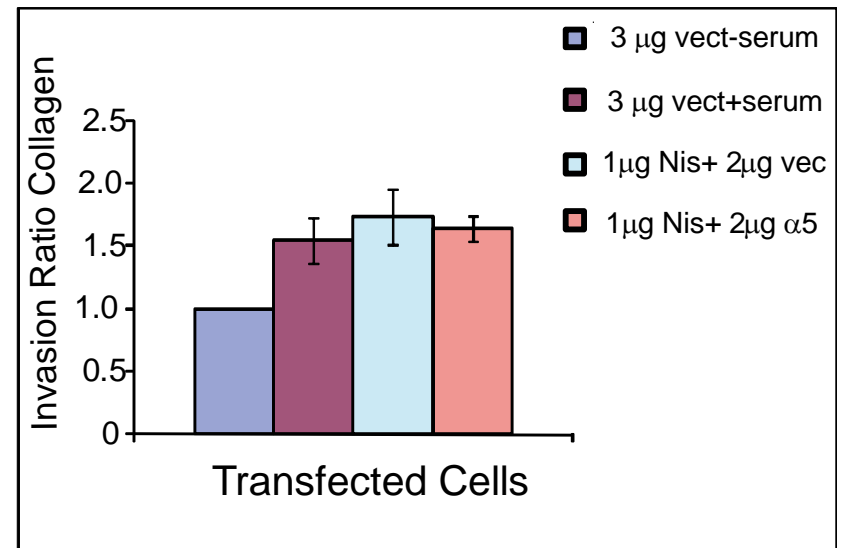

**Supplementary Figure 5:** Effect of nischarin overexpression on invasiveness of MDA-MB-231 cells. MDA-MB-231 cells were transiently transfected with indicated amounts of nischarin + vector DNA, nischarin +  $\alpha 5$  integrin DNA, or vector DNA alone. Assays of cell invasion through a poly-lysine matrix (**A**) or a collagen matrix (**B**) were performed as described in Methods and cells that had migrated to the serum-containing lower chamber were counted after X-gal staining. Three replicate assays were done and means with 95% confidence intervals are shown. The designation “n.s.” denotes that non-significant. P values were calculated using two-sided Student t-tests. We concluded that nischarin overexpression did not block serum-induced invasion on a poly-lysine or collagen matrix.
