# Supplementary material
Source: PubMed Central journal article supplement (PMC3196482)
Supplement: supp_djr350_JNCI_10_0599_s06.pdf [file supp_djr350_JNCI_10_0599_s06.pdf]

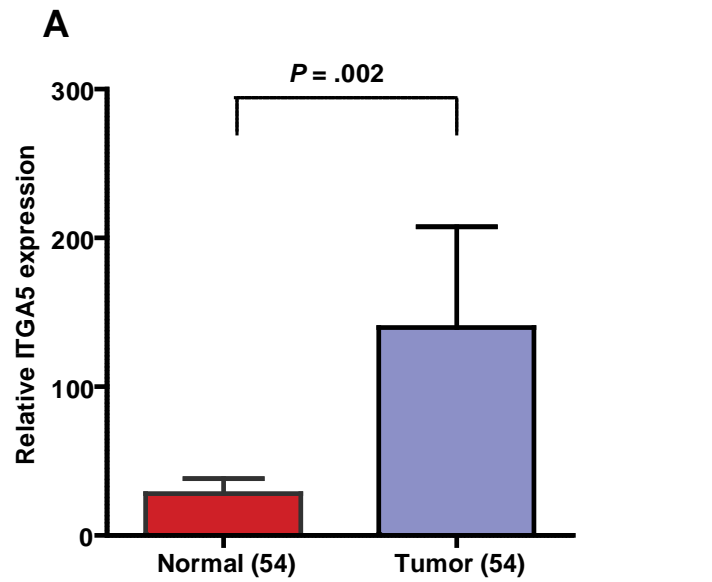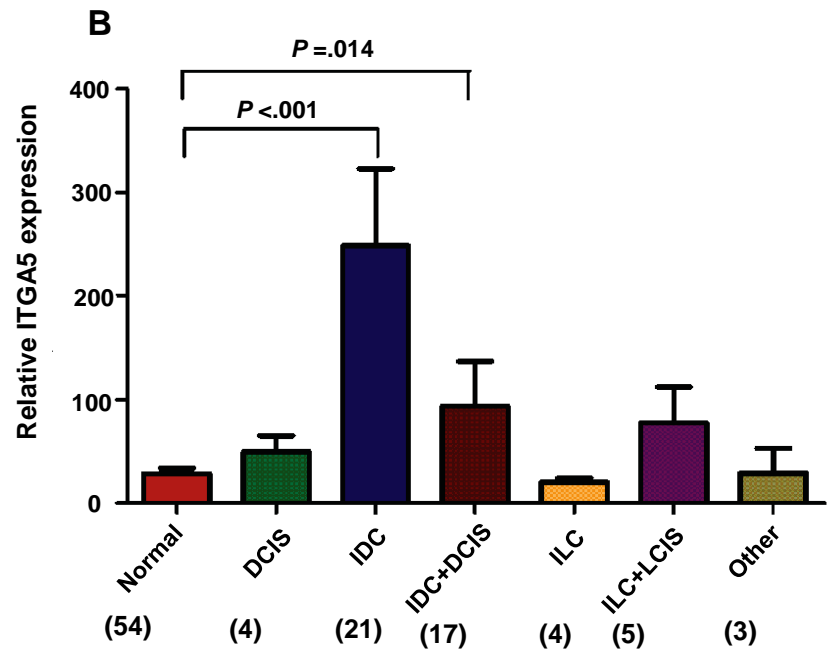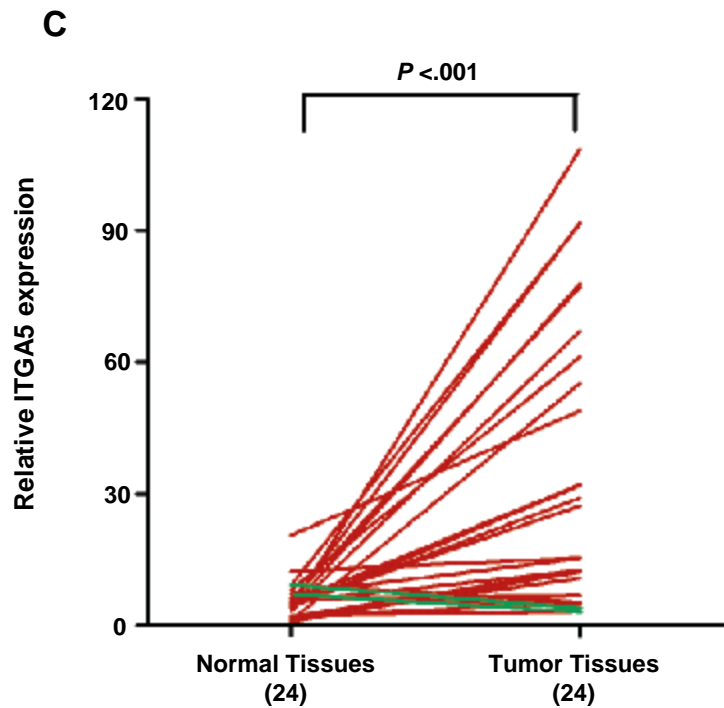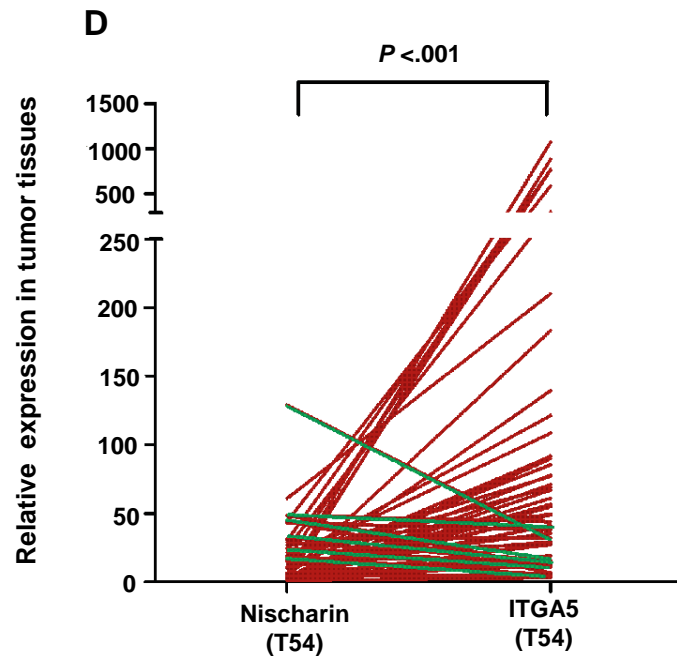

**Supplementary Figure 6.** Expression of  $\alpha 5$  integrin (*ITGA5*) mRNA during breast cancer progression **A)** Quantitative polymerase chain reaction (QPCR) analysis of  $\alpha 5$  integrin mRNA expression in 54 normal and 54 tumor samples (24 of these were matched; the remainder were not). Reactions were performed in triplicate and a two-sided Student t-test was used to evaluate the statistical significance of the mean  $\alpha 5$  integrin expression levels between normal and tumor samples ( $P = .002$ ). Error bars represent 95% confidence intervals. **B)** QPCR analysis of  $\alpha 5$  integrin mRNA expression in breast tissue specimens, by cancer stage. The data from the same 54 breast cancer specimens and 54 normal breast tissue specimens as in **(A)** are listed by cancer stage. Again, tumor samples had a statistically significant increase in  $\alpha 5$  integrin mRNA based on student t test ( $P < .001$ ). **C)** Relative expression of *ITGA5* ( $\alpha 5$  integrin) mRNA in 24 patient-matched breast cancer samples and adjacent noncancerous breast tissue. In all patients but one,  $\alpha 5$  integrin expression was lower in normal than in breast cancer tissue (**Red vs Green lines**). A two-sided t-test was used to evaluate statistical significance of expression between matched normal and tumor samples ( $P < .001$ ). Error bars represent 95% confidence intervals. **D)** Relative expression of nischarin and *ITGA5* mRNA in breast cancer tissues. In most patients,  $\alpha 5$  integrin expression was low when nischarin was high (**Red vs Green lines**). A two-sided t-test was used to evaluate the statistical significance of expression between normal and tumor samples ( $P = .001$ ). Error bars represent 95% confidence intervals.
