# Supplementary material
Source: PubMed Central journal article supplement (PMC3196482)
Supplement: supp_djr350_JNCI_10_0599_s07.pdf [file supp_djr350_JNCI_10_0599_s07.pdf]

A

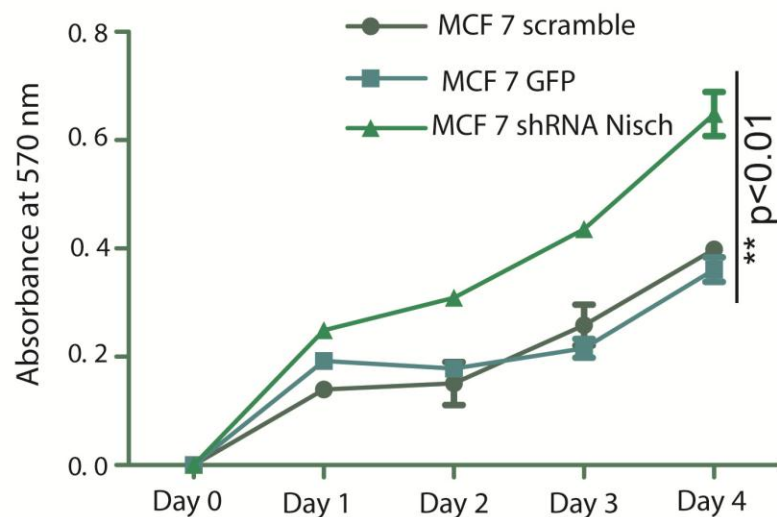

B

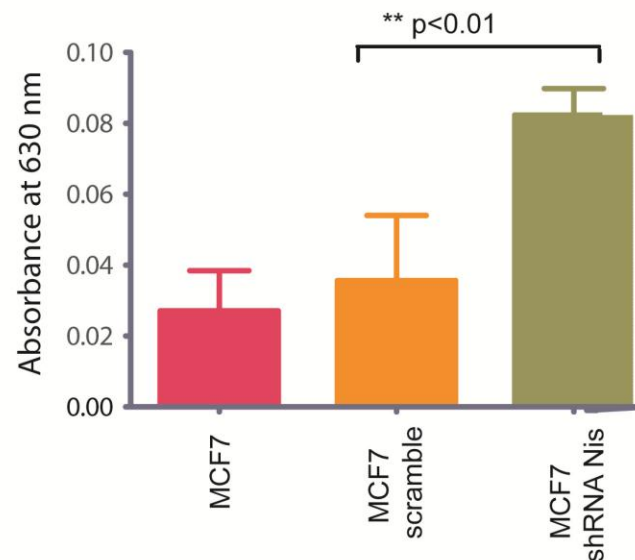

**Supplementary Figure 7:** Effect of Nischarin silencing on growth properties of MCF-7 cells. **A)** Effect on cell proliferation. MCF-7 cells transduced with lentiviruses expressing green fluorescence protein (GFP) alone, scrambled short hairpin RNA (shRNA), or shRNA to Nischarin were seeded onto 96 well plates (5000 cells per well) and their growth was assessed daily, in triplicate, by 3-(4,5-dimethylthiazol-2-yl)-2,5-diphenyltetrazolium bromide (MTT) assays. Error bars represent 95% confidence intervals. MCF-7 cells that expressed shRNA to silence Nischarin expression grew better than cells expressing a control plasmid ( $P$  for MCF-7-GFP vs MCF-7-nisch shRNA = .004) or scrambled shRNA ( $P$  value for MCF-7 scrambled shRNA vs MCF-7-nisch shRNA = .004; from two-sided Student t-tests). **B)** Effect on cellular invasiveness. MCF-7 cells were transduced with lentiviruses expressing GFP, scrambled shRNA, or shRNA to Nischarin and placed on transwell filters coated with Matrigel to assess cell invasion towards a serum-containing chamber in triplicate. Error bars represent 95% confidence intervals. MCF-7 cells that expressed shRNA to silence Nischarin expression were more invasive than cells expressing a control plasmid ( $P$  for MCF-7-GFP vs MCF-7-nisch shRNA < .001) or scrambled shRNA ( $P$  value for MCF-7-scrambled shRNA vs MCF-7-nischarin shRNA = .021;  $P$  values were calculated using two-sided Student t-tests).
