# Supplementary material
Source: PubMed Central journal article supplement (PMC3196482)
Supplement: supp_djr350_JNCI_10_0599_s08.pdf [file supp_djr350_JNCI_10_0599_s08.pdf]

Mouse IgG

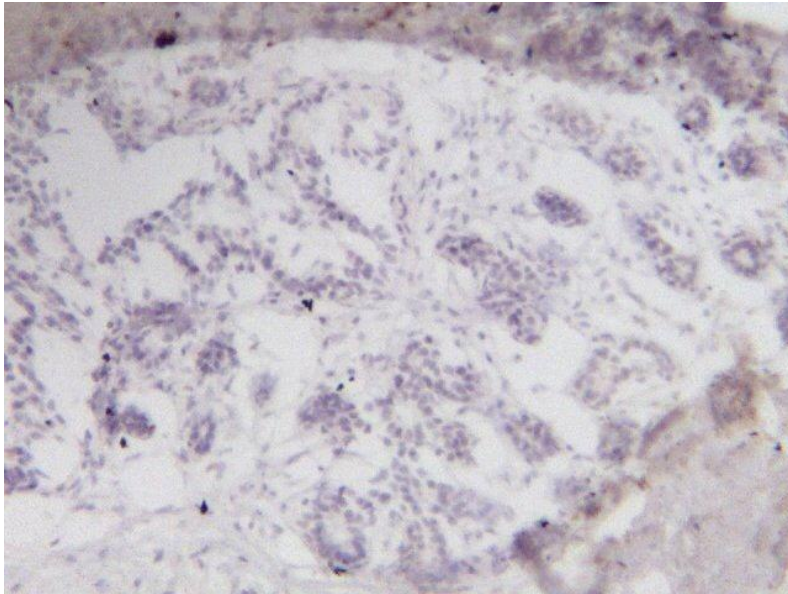

Anti-Nischarin antibody

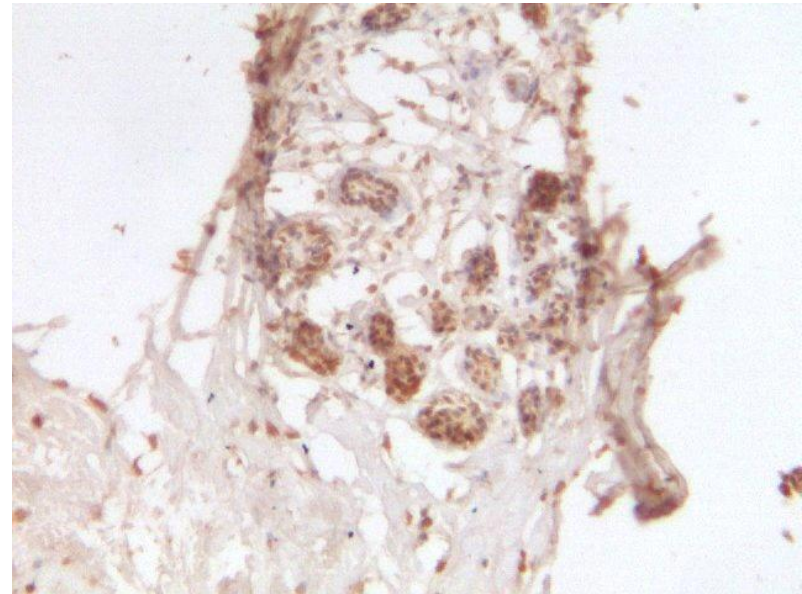

**Supplementary Figure 8:** Optimization of Nischarin staining on breast tissues. As described in methods, normal breast sections were stained with either mouse IgG (left panel) or a mouse monoclonal anti-nischarin antibody (right panel) and images were captured on a simple microscope.
